# Supplementary material for: O6-methylguanine DNA methyltransferase and glucose transporter 2 in foregut and hindgut gastrointestinal neuroendocrine neoplasms
Source: PubMed Central journal article supplement (PMC7720403; doi:10.1186/s12885-020-07579-6), 2020-12-07
Supplement: 12885_2020_7579_MOESM1_ESM.pdf [file 12885_2020_7579_MOESM1_ESM.pdf]

***Positive Control of GLUT2 and MGMT***

***GLUT2***

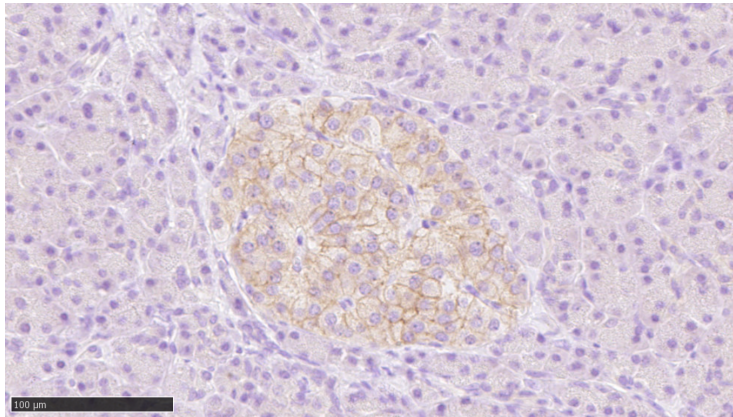

Membranous immunoreactivity on islet of langerhans

***MGMT***

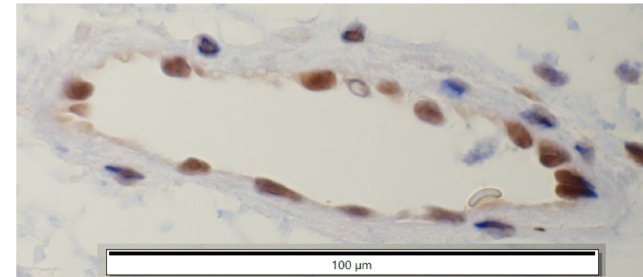

Nucleic immunoreactivity on vascular endothelial cell
