# Supplementary material for: O6-methylguanine DNA methyltransferase and glucose transporter 2 in foregut and hindgut gastrointestinal neuroendocrine neoplasms
Source: PubMed Central journal article supplement (PMC7720403; doi:10.1186/s12885-020-07579-6), 2020-12-07
Supplement: 12885_2020_7579_MOESM2_ESM.pdf [file 12885_2020_7579_MOESM2_ESM.pdf]

# HALO image analysis software with the CytoNuclear IHC v1.6 algorithm module

## Step 1 Marking tumoral area

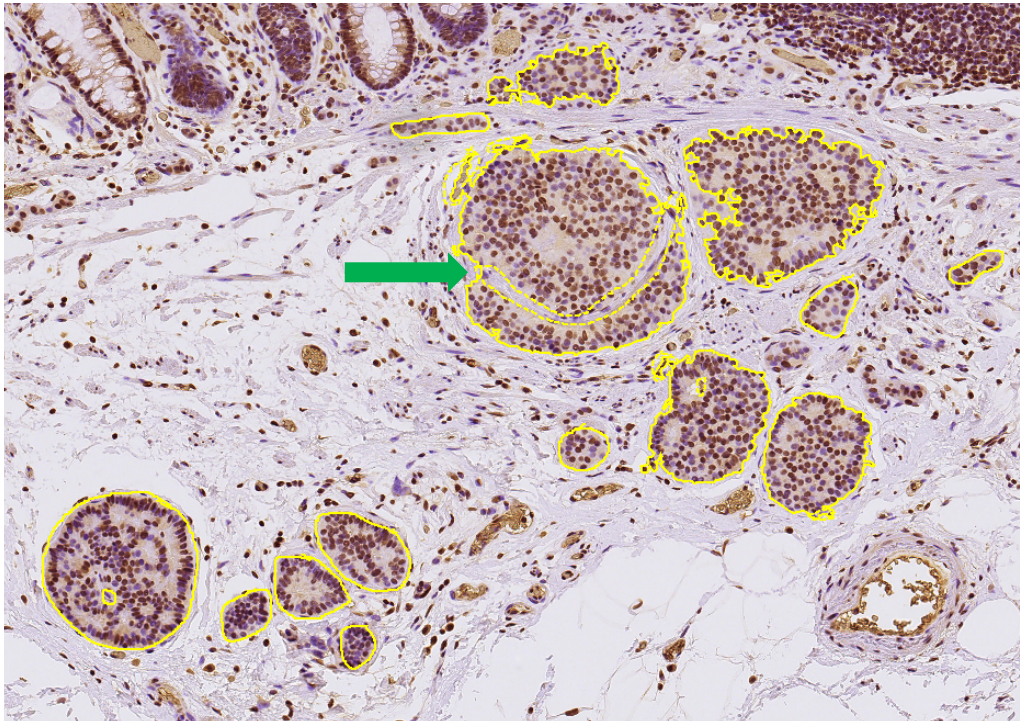

Marking tumor (yellow line) and removing interstitium including vessels (yellow broken line, see green arrow)

## Step 2 Setting "Stain Selection"

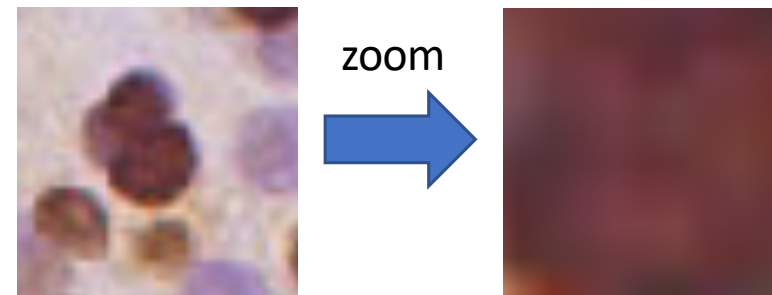

Selecting representative stained cell, adjust average intensity by regulate pixel zoom and setting "Positive Stain"
