# Supplementary material for: O6-methylguanine DNA methyltransferase and glucose transporter 2 in foregut and hindgut gastrointestinal neuroendocrine neoplasms
Source: PubMed Central journal article supplement (PMC7720403; doi:10.1186/s12885-020-07579-6), 2020-12-07
Supplement: 12885_2020_7579_MOESM3_ESM.pdf [file 12885_2020_7579_MOESM3_ESM.pdf]

# HALO image analysis software with the CytoNuclear IHC v1.6 algorithm module

## Step 3 Setting parameter of “Cell Detection”

### *Cell Detection*

- Nuclear Contrast Threshold
- Minimum Nuclear OD
- Nuclear size
- Minimum Nuclear Roundness
- Nuclear Segmentation Aggressiveness

Setting parameter of nuclear contrast, optical density, size, and shape by regulating above parameters

## Step 4 Setting the thresholds of immunoreactivity

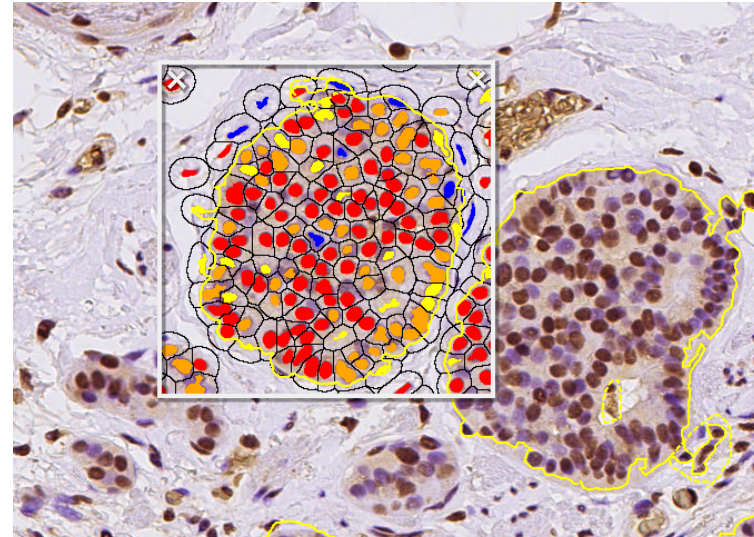

Blue: negative  
Yellow: weak positive  
Orange: moderate positive  
Red: strong positive

Setting thresholds of negative, weak, moderate and strong positive
