# Supplementary material for: O6-methylguanine DNA methyltransferase and glucose transporter 2 in foregut and hindgut gastrointestinal neuroendocrine neoplasms
Source: PubMed Central journal article supplement (PMC7720403; doi:10.1186/s12885-020-07579-6), 2020-12-07
Supplement: 12885_2020_7579_MOESM4_ESM.pdf [file 12885_2020_7579_MOESM4_ESM.pdf]

# HALO image analysis software with the CytoNuclear IHC v1.6 algorithm module

## Step 5 Analyzing the all marked tumor area and confirming the Results

### **Results**

% Stain 1 Positive Cells

% Stain 1 0+ Cells

% Stain 1 1+ Cells

% Stain 1 2+ Cells

% Stain 1 3+ Cells

Stain 1 H-score

% Stain 0+: negative

% Stain 1+: weak positive

% Stain 2+: moderate positive

% Stain 3+: strong positive

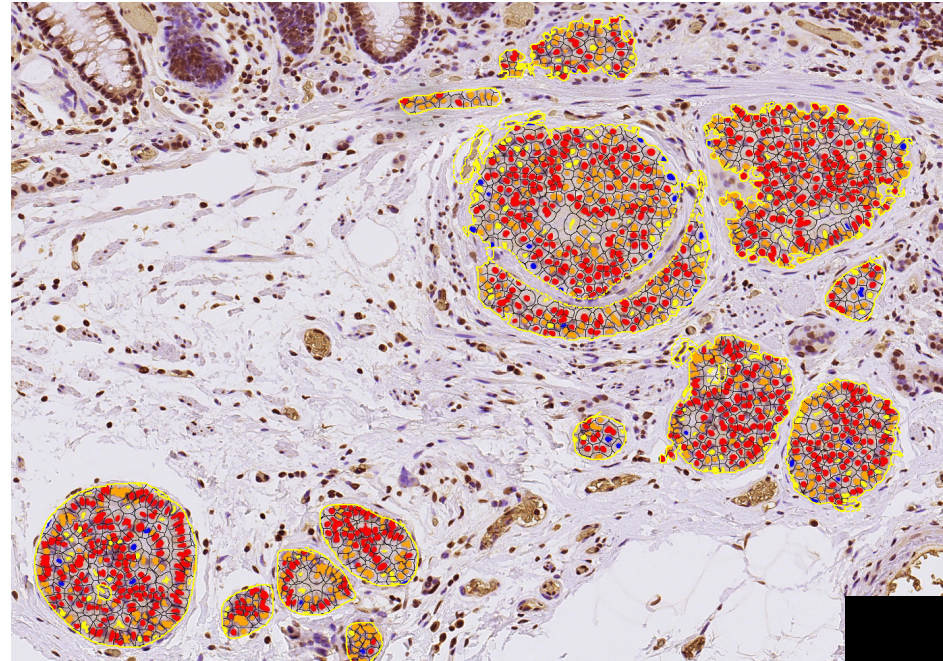

Blue: negative

Yellow: weak positive

Orange: moderate positive

Red: strong positive
